# Supplementary material for: Stimuli-responsive phenothiazine-based donor–acceptor isomers: AIE, mechanochromism and polymorphism
Source: Royal Society of Chemistry journal article supplement (doi:10.1039/c9tc05192a), 2020-01-01
Supplement: c9tc05192a1.pdf [file c9tc05192a1.pdf]

**Stimuli-responsive phenothiazine-based donor-acceptor isomers:  
AIE, mechanochromism and polymorphism**

**Anupama Ekbote, Shaikh M. Mobin and Rajneesh Misra\***

<sup>a</sup>Department of Chemistry, Indian Institute of Technology Indore,  
Indore- 453552, India

\* Corresponding author

Email: [rajneeshmisra@iiti.ac.in](mailto:rajneeshmisra@iiti.ac.in)

**Table of Contents**

|              |                                                                  |            |
|--------------|------------------------------------------------------------------|------------|
| <b>I.</b>    | <b>Experimental Section</b> .....                                | <b>S1</b>  |
| <b>II.</b>   | <b>Solvatochromism</b> .....                                     | <b>S2</b>  |
| <b>III.</b>  | <b>Aggregation Induced Emission</b> .....                        | <b>S3</b>  |
| <b>IV.</b>   | <b>Single Crystal X-ray Analysis</b> .....                       | <b>S4</b>  |
| <b>V.</b>    | <b>Crystallographic Data</b> .....                               | <b>S6</b>  |
| <b>VI.</b>   | <b>SEM Studies</b> .....                                         | <b>S9</b>  |
| <b>VII.</b>  | <b>PXRD Studies</b> .....                                        | <b>S10</b> |
| <b>VIII.</b> | <b>DFT Calculations</b> .....                                    | <b>S11</b> |
| <b>IX.</b>   | <b>TDDFT Calculations</b> .....                                  | <b>S15</b> |
| <b>X.</b>    | <b>TDDFT Data</b> .....                                          | <b>S19</b> |
| <b>XI.</b>   | <b>Copies of NMR and HRMS spectra of the new compounds</b> ..... | <b>S22</b> |

## Experimental Section

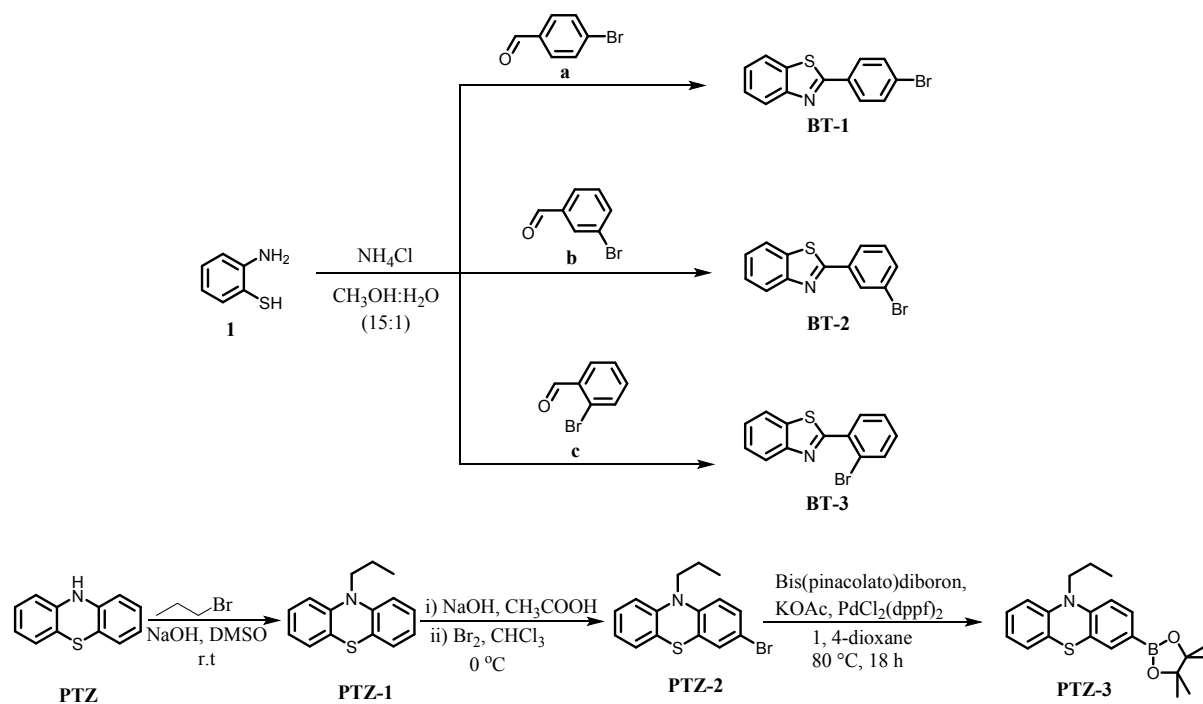

**Scheme S1.** Synthetic routes to intermediates.

## Solvatochromism

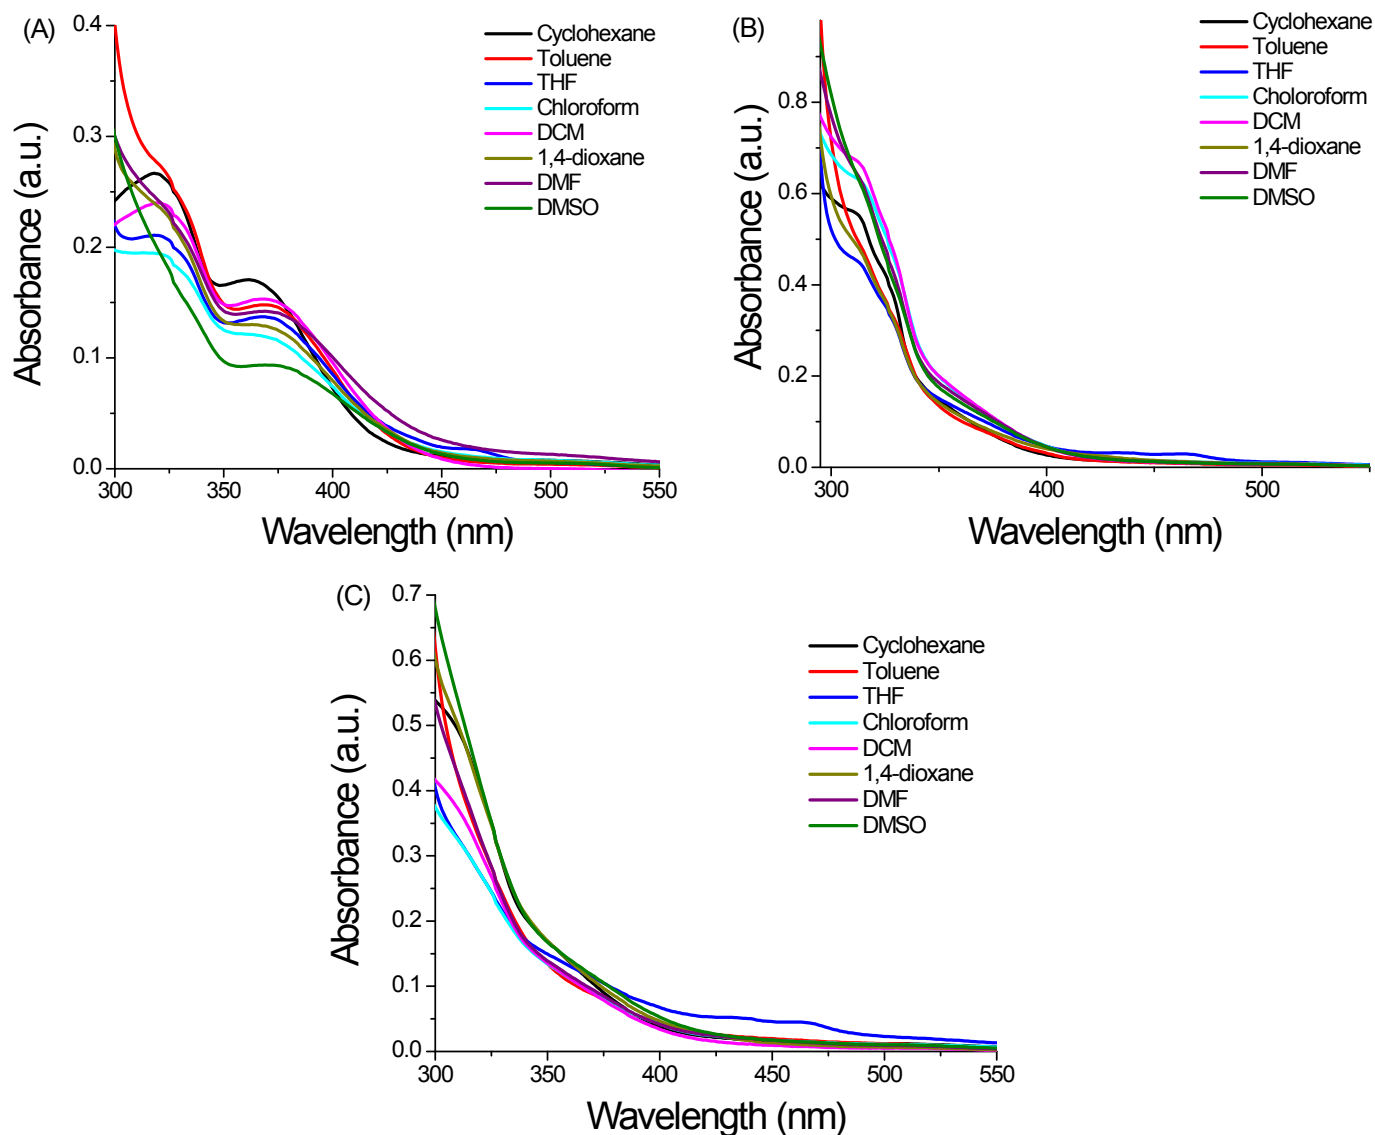

**Figure S1.** Electronic absorption spectra of (A) *p*-PTZ, (B) *m*-PTZ and (C) *o*-PTZ in solvents of various polarity.

**Table S1.** Quantum yield of *p*-PTZ, *m*-PTZ and *o*-PTZ in various solvents.

| Solvents    | $\phi_f^a$    |               |               |
|-------------|---------------|---------------|---------------|
|             | <i>p</i> -PTZ | <i>m</i> -PTZ | <i>o</i> -PTZ |
| Cyclohexane | 0.36          | 0.11          | 0.09          |
| Toluene     | 0.50          | 0.13          | 0.12          |
| THF         | 0.43          | 0.04          | 0.06          |
| Chloroform  | 0.68          | 0.05          | 0.12          |
| DCM         | 0.51          | 0.03          | 0.12          |
| 1,4-dioxane | 0.53          | 0.08          | 0.14          |
| DMF         | 0.14          | 0.004         | 0.03          |
| DMSO        | 0.26          | 0.004         | 0.02          |

<sup>a</sup> Fluorescence quantum yields recorded using quinine sulphate as a standard in 0.5 M H<sub>2</sub>SO<sub>4</sub> solution.

### Aggregation Induced Emission

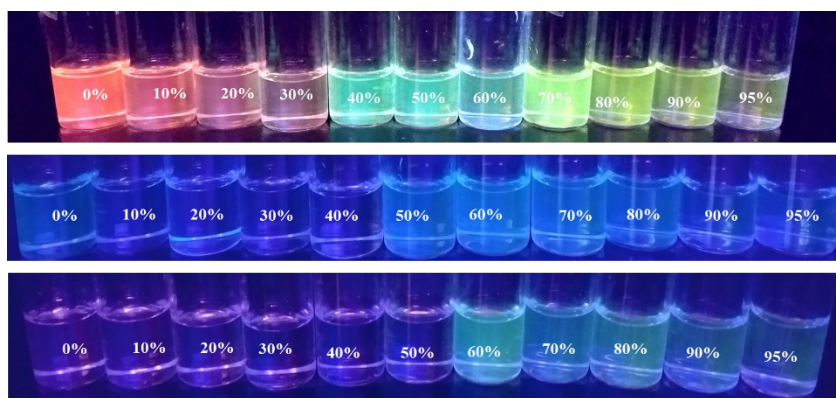

**Figure S2.** Photographs of *p*-PTZ, *m*-PTZ and *o*-PTZ in THF–water mixtures with different water fractions (10  $\mu$ M) under 365 nm UV illumination.

### Single Crystal X-ray Analysis

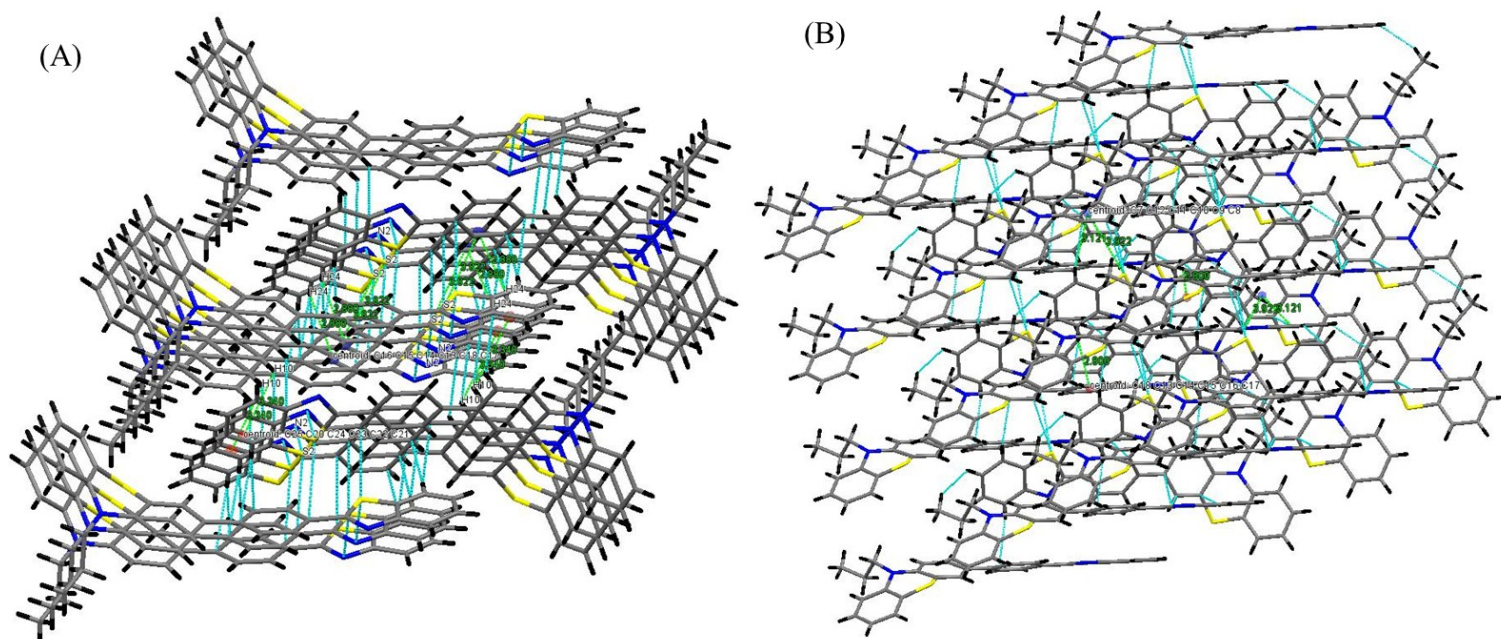

**Figure S3.** Crystal packing diagram of (A) *p*-PTZ GC and (B) *p*-PTZ YC.

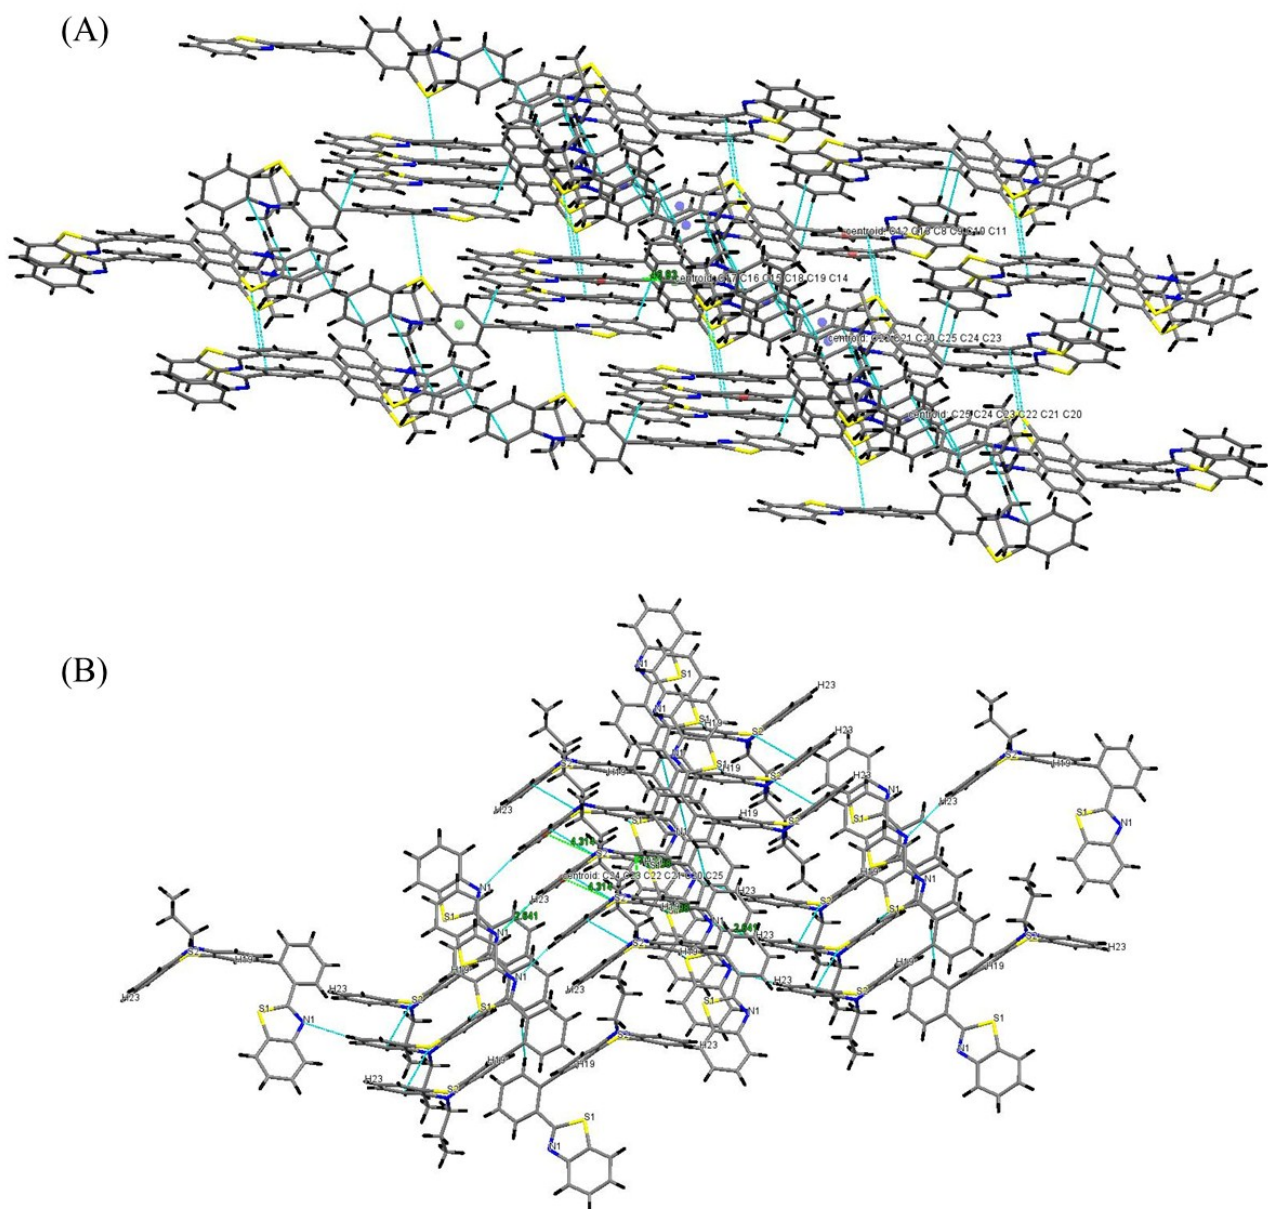

**Figure S4.** Crystal packing diagram of (A) *m*-PTZ and (B) *o*-PTZ.

### Crystallographic data

Single crystal X-ray structures of *p*-PTZ GC and *p*-PTZ YC were performed on a CCD Agilent Technologies (Oxford Diffraction) SUPER NOVA diffractometer. The strategy for the Data collection was evaluated by using the CrysAlisPro CCD software. The data were collected by the standard  $\phi$   $\omega$  scan techniques and were scaled and reduced using CrysAlisPro RED software. Diffraction data for *m*-PTZ was collected using (BRUKER KAPPA APEX II CCD Duo) with graphite monochromatic Mo K $\alpha$  radiation (0.71073 Å), on an Xcalibur, Eos, Gemini diffractometer. Single crystal X-ray data for compound *o*-PTZ were collected on a Bruker D8 VENTURE diffractometer equipped with CMOS Photon 100 detector and MoK $\alpha$  ( $\lambda = 0.71073$  Å) radiation was used. The structures were solved by direct methods using SHELXS-97 and refined by full matrix least-squares with SHELXL-97, refining on F<sup>2</sup>. The positions of all the atoms were obtained by direct methods. All non-hydrogen atoms were refined anisotropically. The remaining hydrogen atoms were placed in geometrically constrained positions, and refined with isotropic temperature factors, generally 1.2U<sub>eq</sub> of their parent atoms. The crystal and refinement data are summarized in Table S1. The CCDC number 1948197, 1948216, 1948223 and 1948310 contains the supplementary crystallographic data for *p*-PTZ GC, *p*-PTZ YC, *m*-PTZ and *o*-PTZ. These data can be obtained free of charge via

[www.ccdc.cam.ac.uk](http://www.ccdc.cam.ac.uk) (or from the Cambridge Crystallographic Data Centre, 12 union Road, Cambridge CB21 EZ, UK; Fax: (+44) 1223-336-033; or [deposit@ccdc.cam.ac.uk](mailto:deposit@ccdc.cam.ac.uk)).

**Table S2.** Crystal data and structure refinement for *p*-PTZ GC, *p*-PTZ YC, *m*-PTZ and *o*-PTZ.

| Identification code         | rm259                      | rm257                      | shelx                      | shelx                      |
|-----------------------------|----------------------------|----------------------------|----------------------------|----------------------------|
| Empirical formula           | C28 H22 N2 S2              |
| Formula weight              | 450.59                     | 450.59                     | 450.59                     | 450.59                     |
| Temperature                 | 293(2) K                   | 293(2) K                   | 293(2) K                   | 296(2) K                   |
| Wavelength                  | 0.71073 Å                  | 0.71073 Å                  | 0.71073 Å                  | 0.71073 Å                  |
| Crystal system, space group | Monoclinic, P 21           | Orthorhombic, P n a 21     | Monoclinic P 21/c          | Monoclinic, P 21/c         |
| a/(Å)                       | 8.5948(5)                  | 39.769(3)                  | 9.5843(3)                  | 5.7861(2)                  |
| b/(Å)                       | 5.5944(3)                  | 7.1785(5)                  | 8.1855(4)                  | 23.6600(7)                 |
| c/(Å)                       | 23.1405(11)                | 7.7524(8)                  | 28.7754(13)                | 16.4878(5)                 |
| Alpha/(°)                   | 90                         | 90                         | 90                         | 90                         |
| Beta/(°)                    | 95.751(5)                  | 90                         | 92.432(4)                  | 92.684(2)                  |
| Gamma/(°)                   | 90                         | 90                         | 90                         | 90                         |
| Volume                      | 1107.06(10) Å <sup>3</sup> | 2213.2(3) Å <sup>3</sup>   | 2255.46(17) Å <sup>3</sup> | 2254.69(12) Å <sup>3</sup> |
| Z, Calculated density       | 2, 1.352 mg/m <sup>3</sup> | 4, 1.352 mg/m <sup>3</sup> | 4, 1.327 mg/m <sup>3</sup> | 4, 1.327 mg/m <sup>3</sup> |



|                                                  |                                             |                                             |                                             |                                             |
|--------------------------------------------------|---------------------------------------------|---------------------------------------------|---------------------------------------------|---------------------------------------------|
| Absorption coefficient                           | 0.260 mm <sup>-1</sup>                      | 0.260 mm <sup>-1</sup>                      | 0.255 mm <sup>-1</sup>                      | 0.255 mm <sup>-1</sup>                      |
| F(000)                                           | 472                                         | 944                                         | 944                                         | 944                                         |
| Crystal size                                     | 0.230 x 0.180 x 0.130 mm                    | 0.260 x 0.230 x 0.180 mm                    | 0.250 x 0.100 x 0.060 mm                    | 0.300 x 0.103 x 0.030 mm                    |
| Θ range for data collection/(°)                  | 3.384 to 29.083                             | 2.820 to 30.551                             | 3.273 to 29.132                             | 1.506 to 28.433                             |
| Reflections collected / unique                   | 9102 / 4635<br>[R(int) = 0.0708]            | 23519 / 5412<br>[R(int) = 0.0968]           | 25562 / 5521<br>[R(int) = 0.0674]           | 24538 / 5645 [R(int) = 0.0691]              |
| Completeness to theta                            | Θ = 25.242<br>99.6 %                        | Θ = 25.242<br>99.9 %                        | Θ = 25.242<br>99.8 %                        | Θ = 25.242<br>99.7 %                        |
| Refinement method                                | Full-matrix least-squares on F <sup>2</sup> |
| Data / restraints / parameters                   | 4635 / 3 / 290                              | 5412 / 1 / 289                              | 5521 / 0 / 289                              | 5645 / 2 / 299                              |
| Goodness-of-fit on F <sup>2</sup>                | 1.105                                       | 1.066                                       | 1.029                                       | 0.918                                       |
| Final R indices [I>2σ(I)]                        | R1 = 0.1287,<br>wR2 = 0.3277                | R1 = 0.0762,<br>wR2 = 0.2056                | R1 = 0.0612,<br>wR2 = 0.1138                | R1 = 0.0537,<br>wR2 = 0.1199                |
| R indices (all data)                             | R1 = 0.2379,<br>wR2 = 0.4181                | R1 = 0.1058,<br>wR2 = 0.2487                | R1 = 0.1204,<br>wR2 = 0.1353                | R1 = 0.1379,<br>wR2 = 0.1538                |
| Extinction coefficient                           | 0.050(18)                                   | n/a                                         | n/a                                         | n/a                                         |
| Largest diff. peak and hole (e.Å <sup>-3</sup> ) | 0.972 and -0.606                            | 0.658 and -0.623                            | 0.413 and -0.278                            | 0.383 and -0.280                            |

## SEM studies

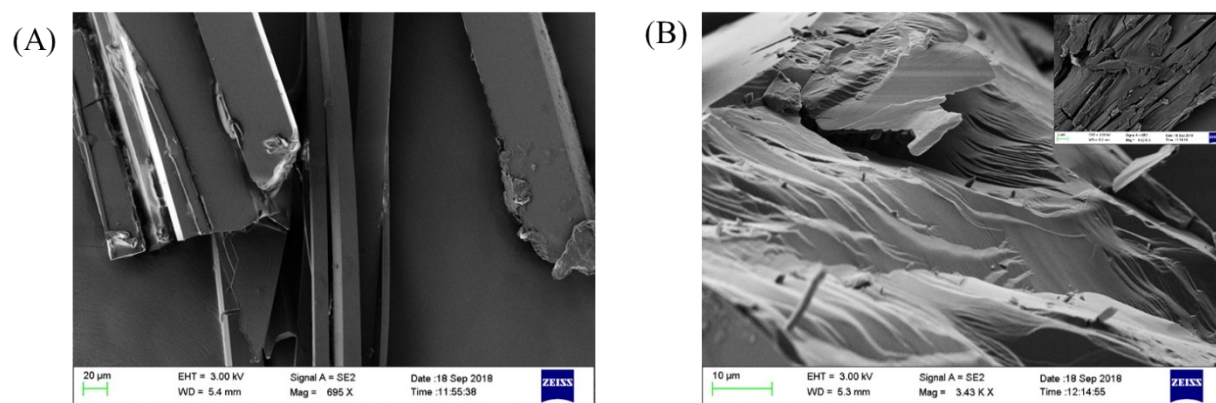

**Figure S5.** SEM images of the polymorphs (A) *p*-PTZ GC and (B) *p*-PTZ YC.

## **PXRD studies**

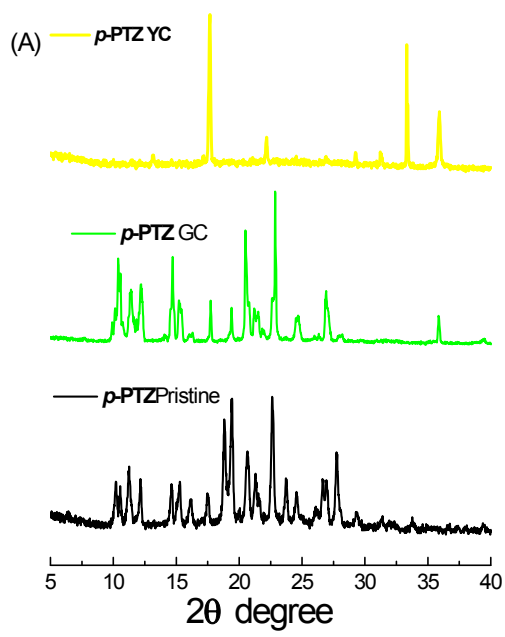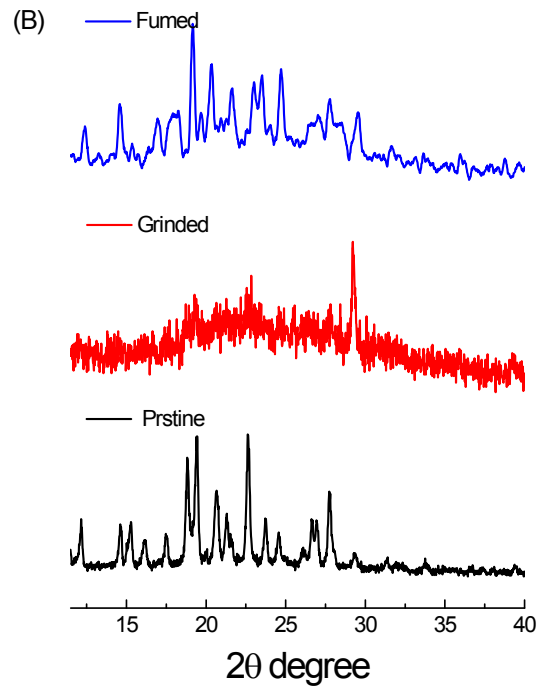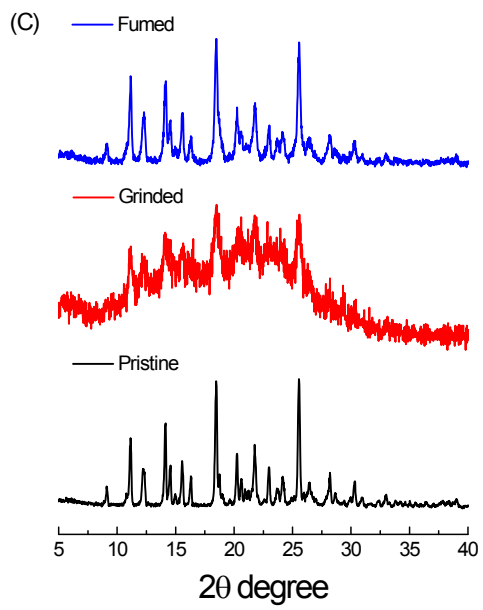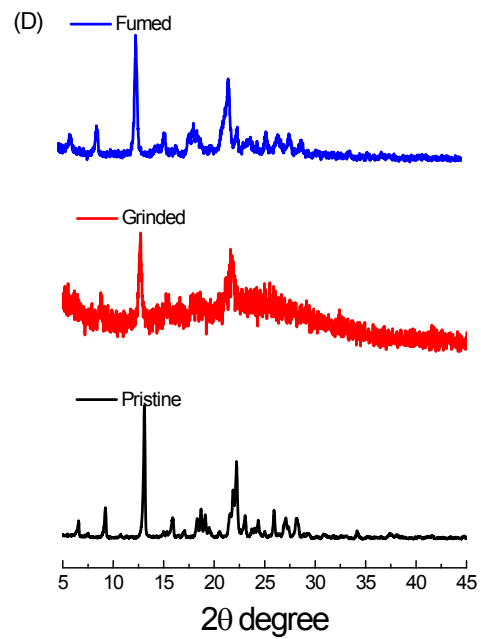

**Figure S6.** PXRD patterns of (A) *p*-PTZ pristine and its polymorphs *p*-PTZ GC and *p*-PTZ YC and (B) *p*-PTZ, (C) *m*-PTZ and (D) *o*-PTZ in its pristine, grinded and fumed forms.

#### **DFT calculations**

**DFT calculation data of *p*-PTZ, *m*-PTZ and *o*-PTZ**

Calculation method: B3LYP/6-31G +(d,p) with Gaussian 09.

***p*-PTZ:**

Standard orientation:

| Center<br>Number | Atomic<br>Number | Atomic<br>Type | Coordinates (Angstroms) |           |           |
|------------------|------------------|----------------|-------------------------|-----------|-----------|
|                  |                  |                | X                       | Y         | Z         |
| 1                | 16               | 0              | -5.951992               | -1.557822 | -0.132935 |
| 2                | 7                | 0              | -5.880428               | 1.052001  | 0.021709  |
| 3                | 6                | 0              | -7.473224               | -0.694649 | -0.066458 |
| 4                | 6                | 0              | -8.778051               | -1.195737 | -0.083327 |
| 5                | 1                | 0              | -8.969946               | -2.262207 | -0.145443 |
| 6                | 6                | 0              | -9.832012               | -0.285022 | -0.017621 |
| 7                | 1                | 0              | -10.853952              | -0.651892 | -0.028903 |
| 8                | 6                | 0              | -9.589798               | 1.099273  | 0.062985  |
| 9                | 1                | 0              | -10.429472              | 1.785902  | 0.112784  |
| 10               | 6                | 0              | -8.291444               | 1.597685  | 0.079652  |
| 11               | 1                | 0              | -8.090484               | 2.662249  | 0.141199  |
| 12               | 6                | 0              | -7.215715               | 0.697277  | 0.014713  |
| 13               | 6                | 0              | -5.099829               | 0.014021  | -0.049267 |
| 14               | 6                | 0              | -3.634071               | 0.087786  | -0.059915 |
| 15               | 6                | 0              | -3.004148               | 1.341734  | 0.045648  |
| 16               | 1                | 0              | -3.619962               | 2.228770  | 0.143961  |
| 17               | 6                | 0              | -1.617976               | 1.440653  | 0.039074  |
| 18               | 1                | 0              | -1.157968               | 2.417705  | 0.151941  |
| 19               | 6                | 0              | -0.800852               | 0.298920  | -0.075853 |
| 20               | 6                | 0              | -1.438032               | -0.950832 | -0.182006 |
| 21               | 1                | 0              | -0.841475               | -1.849990 | -0.301102 |
| 22               | 6                | 0              | -2.825720               | -1.055560 | -0.173059 |
| 23               | 1                | 0              | -3.278176               | -2.038512 | -0.269055 |
| 24               | 6                | 0              | 0.676760                | 0.413234  | -0.087248 |
| 25               | 6                | 0              | 1.486421                | -0.559047 | 0.525764  |
| 26               | 6                | 0              | 1.322759                | 1.485893  | -0.722197 |
| 27               | 6                | 0              | 2.874273                | -0.440956 | 0.541708  |
| 28               | 1                | 0              | 1.029849                | -1.400791 | 1.037390  |
| 29               | 6                | 0              | 2.712956                | 1.588895  | -0.743619 |
| 30               | 1                | 0              | 0.735982                | 2.231464  | -1.249883 |
| 31               | 6                | 0              | 3.519511                | 0.641451  | -0.091240 |
| 32               | 16               | 0              | 3.863769                | -1.618149 | 1.444804  |
| 33               | 1                | 0              | 3.167181                | 2.407231  | -1.290519 |
| 34               | 7                | 0              | 4.930061                | 0.729618  | -0.052618 |
| 35               | 6                | 0              | 5.260771                | -1.657716 | 0.336729  |
| 36               | 6                | 0              | 5.673580                | -0.457491 | -0.275577 |
| 37               | 6                | 0              | 5.578114                | 2.029979  | -0.248556 |
| 38               | 6                | 0              | 5.960124                | -2.847043 | 0.121821  |
| 39               | 6                | 0              | 6.810327                | -0.488050 | -1.099542 |
| 40               | 1                | 0              | 5.909625                | 2.168232  | -1.290399 |
| 41               | 1                | 0              | 4.822199                | 2.794255  | -0.060141 |
| 42               | 6                | 0              | 6.743886                | 2.272874  | 0.721805  |
| 43               | 6                | 0              | 7.108484                | -2.856175 | -0.673649 |
| 44               | 1                | 0              | 5.608347                | -3.760871 | 0.591349  |
| 45               | 6                | 0              | 7.528147                | -1.672489 | -1.282143 |
| 46               | 1                | 0              | 7.142982                | 0.414541  | -1.599126 |
| 47               | 1                | 0              | 7.498534                | 1.487093  | 0.616150  |

|    |   |   |          |           |           |
|----|---|---|----------|-----------|-----------|
| 48 | 1 | 0 | 6.358097 | 2.198294  | 1.745236  |
| 49 | 6 | 0 | 7.391065 | 3.644167  | 0.497038  |
| 50 | 1 | 0 | 7.660485 | -3.779194 | -0.820384 |
| 51 | 1 | 0 | 8.411603 | -1.665563 | -1.913695 |
| 52 | 1 | 0 | 6.667492 | 4.457236  | 0.630190  |
| 53 | 1 | 0 | 8.208953 | 3.810489  | 1.205036  |
| 54 | 1 | 0 | 7.806422 | 3.731315  | -0.514085 |

-----  
Total Energy (HF) = -1986.2178289Hartree

***m*-PTZ:**

Standard orientation:

| Center<br>Number | Atomic<br>Number | Atomic<br>Type | Coordinates (Angstroms) |           |           |
|------------------|------------------|----------------|-------------------------|-----------|-----------|
|                  |                  |                | X                       | Y         | Z         |
| 1                | 6                | 0              | 3.490159                | -2.795369 | 0.240697  |
| 2                | 6                | 0              | 3.414093                | -1.396203 | 0.148019  |
| 3                | 6                | 0              | 2.152313                | -0.778950 | 0.118824  |
| 4                | 6                | 0              | 0.970342                | -1.529176 | 0.187743  |
| 5                | 6                | 0              | 1.073163                | -2.930048 | 0.283223  |
| 6                | 1                | 0              | 0.173073                | -3.531405 | 0.365883  |
| 7                | 6                | 0              | 2.321187                | -3.552249 | 0.305737  |
| 8                | 1                | 0              | 2.383793                | -4.633299 | 0.387597  |
| 9                | 1                | 0              | 4.453616                | -3.295578 | 0.267168  |
| 10               | 6                | 0              | 4.619408                | -0.555606 | 0.074434  |
| 11               | 16               | 0              | 6.253929                | -1.281370 | 0.027392  |
| 12               | 7                | 0              | 4.600537                | 0.743708  | 0.038664  |
| 13               | 6                | 0              | 6.928189                | 0.331928  | -0.041615 |
| 14               | 6                | 0              | 5.873147                | 1.278749  | -0.026916 |
| 15               | 6                | 0              | 8.266443                | 0.731174  | -0.103153 |
| 16               | 6                | 0              | 6.172418                | 2.649954  | -0.075167 |
| 17               | 1                | 0              | 9.070665                | 0.002408  | -0.114223 |
| 18               | 6                | 0              | 8.542267                | 2.097137  | -0.150028 |
| 19               | 6                | 0              | 7.503826                | 3.047430  | -0.136207 |
| 20               | 1                | 0              | 5.362223                | 3.371716  | -0.064009 |
| 21               | 1                | 0              | 9.574659                | 2.430216  | -0.198009 |
| 22               | 1                | 0              | 7.747666                | 4.104820  | -0.173887 |
| 23               | 1                | 0              | 2.111874                | 0.299667  | 0.019525  |
| 24               | 6                | 0              | -0.355187               | -0.859240 | 0.165102  |
| 25               | 6                | 0              | -1.449266               | -1.439497 | -0.498907 |
| 26               | 6                | 0              | -0.568406               | 0.363444  | 0.819784  |
| 27               | 6                | 0              | -2.689834               | -0.806609 | -0.539885 |
| 28               | 1                | 0              | -1.327261               | -2.380188 | -1.027277 |
| 29               | 6                | 0              | -1.817551               | 0.983432  | 0.813754  |
| 30               | 1                | 0              | 0.240090                | 0.821181  | 1.381389  |
| 31               | 6                | 0              | -2.899917               | 0.423813  | 0.115109  |
| 32               | 16               | 0              | -4.024001               | -1.505017 | -1.495999 |
| 33               | 1                | 0              | -1.947829               | 1.901245  | 1.375669  |
| 34               | 7                | 0              | -4.174473               | 1.034892  | 0.053679  |
| 35               | 6                | 0              | -5.361249               | -1.047160 | -0.408165 |
| 36               | 6                | 0              | -5.311031               | 0.206316  | 0.234121  |
| 37               | 6                | 0              | -4.294998               | 2.478097  | 0.281364  |
| 38               | 6                | 0              | -6.456846               | -1.895498 | -0.235321 |
| 39               | 6                | 0              | -6.394499               | 0.581910  | 1.044652  |
| 40               | 1                | 0              | -4.576551               | 2.705499  | 1.322385  |
| 41               | 1                | 0              | -3.304113               | 2.909173  | 0.127673  |

|    |   |   |           |           |           |
|----|---|---|-----------|-----------|-----------|
| 42 | 6 | 0 | -5.262581 | 3.160112  | -0.697284 |
| 43 | 6 | 0 | -7.542524 | -1.495043 | 0.547442  |
| 44 | 1 | 0 | -6.459974 | -2.863668 | -0.727195 |
| 45 | 6 | 0 | -7.504536 | -0.254440 | 1.185549  |
| 46 | 1 | 0 | -6.377313 | 1.531315  | 1.567360  |
| 47 | 1 | 0 | -6.255355 | 2.703539  | -0.632036 |
| 48 | 1 | 0 | -4.902664 | 2.977701  | -1.716576 |
| 49 | 6 | 0 | -5.368413 | 4.666312  | -0.433176 |
| 50 | 1 | 0 | -8.400873 | -2.149560 | 0.661807  |
| 51 | 1 | 0 | -8.334704 | 0.065870  | 1.808197  |
| 52 | 1 | 0 | -4.393290 | 5.159920  | -0.522231 |
| 53 | 1 | 0 | -6.046074 | 5.141816  | -1.149142 |
| 54 | 1 | 0 | -5.753645 | 4.871283  | 0.572865  |

-----  
Total Energy (HF) = -1986.2171096Hartree

***o*-PTZ:**

Standard orientation: -----

| Center<br>Number | Atomic<br>Number | Atomic<br>Type | Coordinates (Angstroms) |           |           |
|------------------|------------------|----------------|-------------------------|-----------|-----------|
|                  |                  |                | X                       | Y         | Z         |
| 1                | 6                | 0              | 4.409365                | 2.342206  | -0.761647 |
| 2                | 6                | 0              | 3.221934                | 1.684477  | -0.394889 |
| 3                | 6                | 0              | 1.998779                | 2.402669  | -0.387470 |
| 4                | 6                | 0              | 2.034313                | 3.770007  | -0.710845 |
| 5                | 6                | 0              | 3.221895                | 4.416821  | -1.051801 |
| 6                | 1                | 0              | 3.209236                | 5.473481  | -1.302857 |
| 7                | 6                | 0              | 4.417071                | 3.696598  | -1.088200 |
| 8                | 1                | 0              | 5.348973                | 4.184252  | -1.357549 |
| 9                | 1                | 0              | 1.099431                | 4.322287  | -0.723768 |
| 10               | 1                | 0              | 5.342718                | 1.787294  | -0.753096 |
| 11               | 6                | 0              | 3.307555                | 0.269796  | 0.024958  |
| 12               | 16               | 0              | 4.287658                | -0.883704 | -0.934071 |
| 13               | 7                | 0              | 2.736833                | -0.237473 | 1.071877  |
| 14               | 6                | 0              | 3.870044                | -2.134019 | 0.217023  |
| 15               | 6                | 0              | 3.025277                | -1.583657 | 1.214331  |
| 16               | 6                | 0              | 4.243317                | -3.481657 | 0.241386  |
| 17               | 6                | 0              | 2.552194                | -2.402623 | 2.251895  |
| 18               | 1                | 0              | 4.888797                | -3.899613 | -0.524566 |
| 19               | 6                | 0              | 3.761042                | -4.278171 | 1.278719  |
| 20               | 6                | 0              | 2.923107                | -3.742624 | 2.275168  |
| 21               | 1                | 0              | 1.905654                | -1.976153 | 3.011775  |
| 22               | 1                | 0              | 4.036935                | -5.327789 | 1.316027  |
| 23               | 1                | 0              | 2.560850                | -4.386728 | 3.070692  |
| 24               | 6                | 0              | 0.676575                | 1.779771  | -0.105029 |
| 25               | 6                | 0              | -0.194233               | 2.333114  | 0.838442  |
| 26               | 6                | 0              | 0.227569                | 0.656508  | -0.815262 |
| 27               | 6                | 0              | -1.464140               | 1.797248  | 1.058058  |
| 28               | 1                | 0              | 0.120364                | 3.191888  | 1.423902  |
| 29               | 6                | 0              | -1.022885               | 0.092328  | -0.573374 |
| 30               | 1                | 0              | 0.867928                | 0.197509  | -1.562706 |
| 31               | 6                | 0              | -1.917119               | 0.665749  | 0.357105  |
| 32               | 1                | 0              | -2.096136               | 2.275179  | 1.793906  |
| 33               | 16               | 0              | -1.415410               | -1.453830 | -1.358074 |
| 34               | 7                | 0              | -3.197307               | 0.109173  | 0.583731  |
| 35               | 6                | 0              | -3.183980               | -1.293166 | -1.439471 |



|    |   |   |           |           |           |
|----|---|---|-----------|-----------|-----------|
| 36 | 6 | 0 | -3.885806 | -0.601171 | -0.427475 |
| 37 | 6 | 0 | -3.925582 | 0.490898  | 1.799199  |
| 38 | 6 | 0 | -3.865376 | -1.966101 | -2.455584 |
| 39 | 6 | 0 | -5.291683 | -0.669330 | -0.456868 |
| 40 | 1 | 0 | -3.190805 | 0.555515  | 2.608996  |
| 41 | 1 | 0 | -4.585809 | -0.344554 | 2.056152  |
| 42 | 6 | 0 | -4.748407 | 1.795558  | 1.751716  |
| 43 | 6 | 0 | -5.260518 | -2.026436 | -2.464667 |
| 44 | 1 | 0 | -3.289768 | -2.467249 | -3.228507 |
| 45 | 6 | 0 | -5.966459 | -1.383786 | -1.450183 |
| 46 | 1 | 0 | -5.878762 | -0.164243 | 0.297710  |
| 47 | 1 | 0 | -4.099466 | 2.641831  | 1.505262  |
| 48 | 1 | 0 | -5.487185 | 1.746917  | 0.945584  |
| 49 | 6 | 0 | -5.454173 | 2.054146  | 3.088167  |
| 50 | 1 | 0 | -7.051696 | -1.418109 | -1.428522 |
| 51 | 1 | 0 | -6.142092 | 1.238596  | 3.341471  |
| 52 | 1 | 0 | -4.734001 | 2.145422  | 3.910018  |
| 53 | 1 | 0 | -6.036588 | 2.980186  | 3.053767  |
| 54 | 1 | 0 | -5.779275 | -2.568196 | -3.249037 |

-----  
Total Energy (HF) = -1986.2062057Hartree

### TDDFT calculations of *p*-PTZ, *m*-PTZ and *o*-PTZ

#### *p*-PTZ:

Excitation energies and oscillator strengths:

Excited State 1: Singlet-A 2.9903 eV 414.62 nm f=0.3759  
<S\*\*2>=0.000  
118 ->119 0.69915

This state for optimization and/or second-order correction.

Total Energy, E(TD-HF/TD-KS) = -1986.10793801

Copying the excited state density for this state as the 1-particle  
RhoCI density.

Excited State 2: Singlet-A 3.7131 eV 333.91 nm f=0.9164  
<S\*\*2>=0.000  
117 ->119 0.68505

Excited State 3: Singlet-A 3.7871 eV 327.38 nm f=0.0501  
<S\*\*2>=0.000  
118 ->120 0.64512  
118 ->121 0.12625  
118 ->123 -0.15746

Excited State 4: Singlet-A 3.9301 eV 315.48 nm f=0.0546  
<S\*\*2>=0.000  
116 ->119 0.19793  
118 ->120 -0.10264  
118 ->121 0.62628  
118 ->122 -0.11499

Excited State 5: Singlet-A 4.0373 eV 307.10 nm f=0.0152  
<S\*\*2>=0.000  
115 ->119 0.54719  
116 ->119 -0.25615  
118 ->120 -0.10315  
118 ->122 -0.21531

```

118 ->123      -0.15482
118 ->124      -0.10477

Excited State  6:      Singlet-A      4.0613 eV  305.28 nm  f=0.1524
<S**2>=0.000
115 ->119      0.38066
116 ->119      0.39216
118 ->120      0.11986
118 ->122      0.14050
118 ->123      0.32602
118 ->124      0.14833

Excited State  7:      Singlet-A      4.1694 eV  297.37 nm  f=0.0165
<S**2>=0.000
116 ->119      -0.40685
118 ->121      0.20540
118 ->122      0.42384
118 ->123      0.25275

Excited State  8:      Singlet-A      4.2519 eV  291.60 nm  f=0.0079
<S**2>=0.000
112 ->119      -0.10359
113 ->119      0.16799
116 ->119      -0.22964
118 ->122      -0.35865
118 ->123      0.28395
118 ->124      0.40167

Excited State  9:      Singlet-A      4.4894 eV  276.17 nm  f=0.0299
<S**2>=0.000
114 ->119      0.23367
118 ->123      -0.21951
118 ->124      0.13242
118 ->125      0.56285
118 ->127      -0.17476

Excited State 10:      Singlet-A      4.5261 eV  273.93 nm  f=0.0054
<S**2>=0.000
112 ->119      -0.18002
113 ->119      0.38257
114 ->119      -0.10256
117 ->121      -0.12510
117 ->122      -0.17828
117 ->124      0.16685
118 ->122      0.30697
118 ->123      -0.23950
118 ->124      0.19051
118 ->125      -0.13464

SaveTr:  write IOETrn=   770 NScale= 10 NData= 16 NLR=1 NState= 10
LETran=   190.

```

### ***m*-PTZ**

Excitation energies and oscillator strengths:

```

Excited State  1:      Singlet-A      3.0364 eV  408.33 nm  f=0.0174
<S**2>=0.000
118 ->119      0.70333

```

This state for optimization and/or second-order correction.

Total Energy, E(TD-HF/TD-KS) = -1986.10552408  
 Copying the excited state density for this state as the 1-particle  
 RhoCI density.

Excited State 2: Singlet-A 3.5666 eV 347.62 nm f=0.1550  
 <S\*\*2>=0.000  
 118 ->120 0.66221  
 118 ->122 -0.12555  
 118 ->123 -0.11533

Excited State 3: Singlet-A 3.8851 eV 319.12 nm f=0.0868  
 <S\*\*2>=0.000  
 116 ->119 0.14229  
 117 ->119 0.50296  
 118 ->121 0.39290  
 118 ->122 0.10191  
 118 ->123 0.17535

Excited State 4: Singlet-A 3.9327 eV 315.27 nm f=0.0160  
 <S\*\*2>=0.000  
 115 ->119 -0.10450  
 116 ->119 -0.12774  
 117 ->119 -0.39875  
 117 ->120 -0.10709  
 118 ->120 0.10676  
 118 ->121 0.51599

Excited State 5: Singlet-A 4.0139 eV 308.89 nm f=0.7229  
 <S\*\*2>=0.000  
 114 ->119 0.13612  
 115 ->119 -0.10125  
 116 ->119 0.58820  
 117 ->119 -0.11341  
 118 ->122 -0.15898  
 118 ->123 -0.24563

Excited State 6: Singlet-A 4.0479 eV 306.29 nm f=0.0484  
 <S\*\*2>=0.000  
 115 ->119 -0.13881  
 116 ->119 0.24945  
 117 ->119 -0.13847  
 118 ->120 0.12572  
 118 ->121 -0.18763  
 118 ->122 0.31113  
 118 ->123 0.45105  
 118 ->124 -0.11044

Excited State 7: Singlet-A 4.1435 eV 299.23 nm f=0.0967  
 <S\*\*2>=0.000  
 115 ->119 0.63155  
 116 ->119 0.12411  
 117 ->119 -0.18782

Excited State 8: Singlet-A 4.2731 eV 290.15 nm f=0.0176  
 <S\*\*2>=0.000  
 114 ->119 0.36594  
 117 ->120 0.24933  
 118 ->120 0.10608

```

118 ->122      0.12401
118 ->124      0.47491

Excited State  9:      Singlet-A      4.3462 eV  285.27 nm  f=0.0341
<S**2>=0.000
  114 ->119      0.46226
  116 ->119     -0.11942
  116 ->120     -0.17562
  117 ->120      0.10474
  118 ->120     -0.10070
  118 ->122     -0.15410
  118 ->124     -0.37933

Excited State 10:      Singlet-A      4.4741 eV  277.11 nm  f=0.0078
<S**2>=0.000
  118 ->122      0.54757
  118 ->123     -0.40081
  118 ->124     -0.17136
SavETr: write IOETrn=  770 NScale= 10 NData=  16 NLR=1 NState=  10
LETran=  190.

```

**o-PTZ:**

Excitation energies and oscillator strengths:

```

Excited State  1:      Singlet-A      2.8982 eV  427.80 nm  f=0.0481
<S**2>=0.000
  118 ->119      0.70204

```

This state for optimization and/or second-order correction.

Total Energy, E(TD-HF/TD-KS) = -1986.09969898

Copying the excited state density for this state as the 1-particle RhoCI density.

```

Excited State  2:      Singlet-A      3.4201 eV  362.52 nm  f=0.0364
<S**2>=0.000
  118 ->120      0.60406
  118 ->121     -0.32763

```

```

Excited State  3:      Singlet-A      3.7094 eV  334.24 nm  f=0.0648
<S**2>=0.000
  118 ->120      0.32159
  118 ->121      0.57807
  118 ->124      0.14325

```

```

Excited State  4:      Singlet-A      3.8680 eV  320.54 nm  f=0.0621
<S**2>=0.000
  118 ->122      0.66474
  118 ->124     -0.15433

```

```

Excited State  5:      Singlet-A      3.9114 eV  316.98 nm  f=0.1159
<S**2>=0.000
  117 ->119      0.68514

```

```

Excited State  6:      Singlet-A      4.0314 eV  307.55 nm  f=0.0385
<S**2>=0.000
  117 ->120      0.11945
  118 ->121     -0.16912
  118 ->122      0.16159
  118 ->123     -0.10117

```

```

118 ->124      0.57660
118 ->125     -0.23040

Excited State  7:      Singlet-A      4.0956 eV  302.73 nm  f=0.0009
<S**2>=0.000
  118 ->123      0.68102
  118 ->124      0.12723

Excited State  8:      Singlet-A      4.2507 eV  291.68 nm  f=0.0230
<S**2>=0.000
  118 ->124      0.28257
  118 ->125      0.61145

Excited State  9:      Singlet-A      4.2724 eV  290.20 nm  f=0.0826
<S**2>=0.000
  115 ->119      0.59244
  116 ->119     -0.31054
  116 ->123      0.11317

Excited State 10:      Singlet-A      4.3276 eV  286.50 nm  f=0.0085
<S**2>=0.000
  118 ->126      0.66817
  118 ->127      0.17303
SavETr:  write IOETrn=   770 NScale= 10 NData= 16 NLR=1 NState= 10
LETran=   190.

```

### TDDFT data

**Table S3.** Computed vertical transitions, their oscillator strengths, configurations and corresponding calculated frontier orbitals of *p*-PTZ, *m*-PTZ and *o*-PTZ.

| Compound      | Wavelength (nm) | $f^a$  | Configuration                                                                                                   | Assignment      |
|---------------|-----------------|--------|-----------------------------------------------------------------------------------------------------------------|-----------------|
| <i>p</i> -PTZ | 305.28          | 0.1524 | (HOMO-2)–LUMO (0.39216)<br>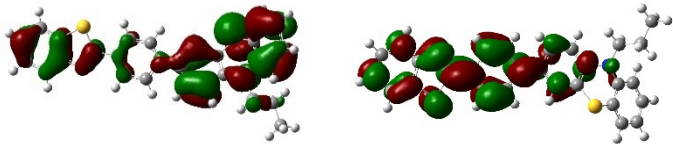   | $\pi$ - $\pi^*$ |
|               | 333.91          | 0.9164 | (HOMO-1)–LUMO (0.68505)<br>   |                 |
|               | 414.62          | 0.3759 | HOMO–LUMO (0.69915)<br>     | ICT             |
| <i>m</i> -PTZ | 299.23          | 0.0967 | (HOMO-3)–LUMO (0.63155)<br> | $\pi$ - $\pi^*$ |
|               | 308.89          | 0.7229 | (HOMO-2)–LUMO (0.58820)<br> | -               |

|               |        |        |                                                                                                                            |                 |
|---------------|--------|--------|----------------------------------------------------------------------------------------------------------------------------|-----------------|
|               |        |        |                                                                                                                            |                 |
|               | 408.33 | 0.0174 | <p>HOMO–LUMO (0.70333)</p> 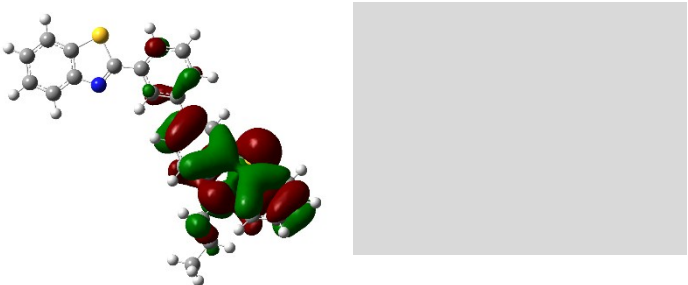              | ICT             |
| <i>o</i> -PTZ | 290.20 | 0.0826 | <p>(HOMO-3)–LUMO (0.59224)</p>         | $\pi$ - $\pi^*$ |
|               | 316.98 | 0.1159 | <p>(HOMO-1)–LUMO (0.68514)</p>         | -               |
|               | 427.80 | 0.0481 | <p>HOMO–LUMO (0.70204)</p> <p>S22</p>  | ICT             |

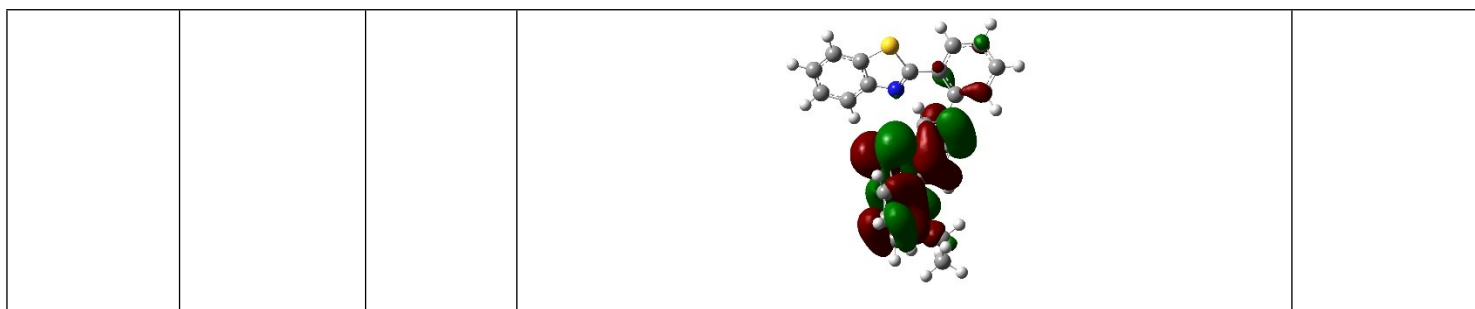

<sup>a</sup> Oscillator strength.

### Copies of NMR and HRMS of new compounds

<sup>1</sup>H NMR of *p*-PTZ:



RM-AE-PPTZ.001.esp

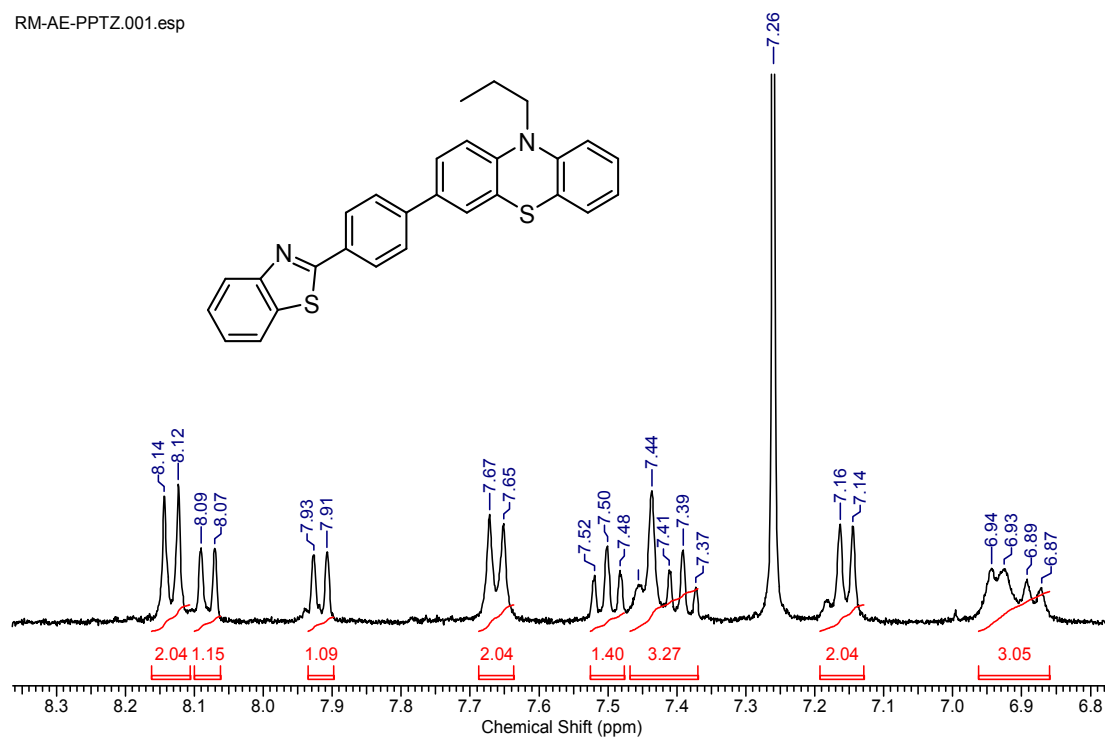

RM-AE-PPTZ.001.esp

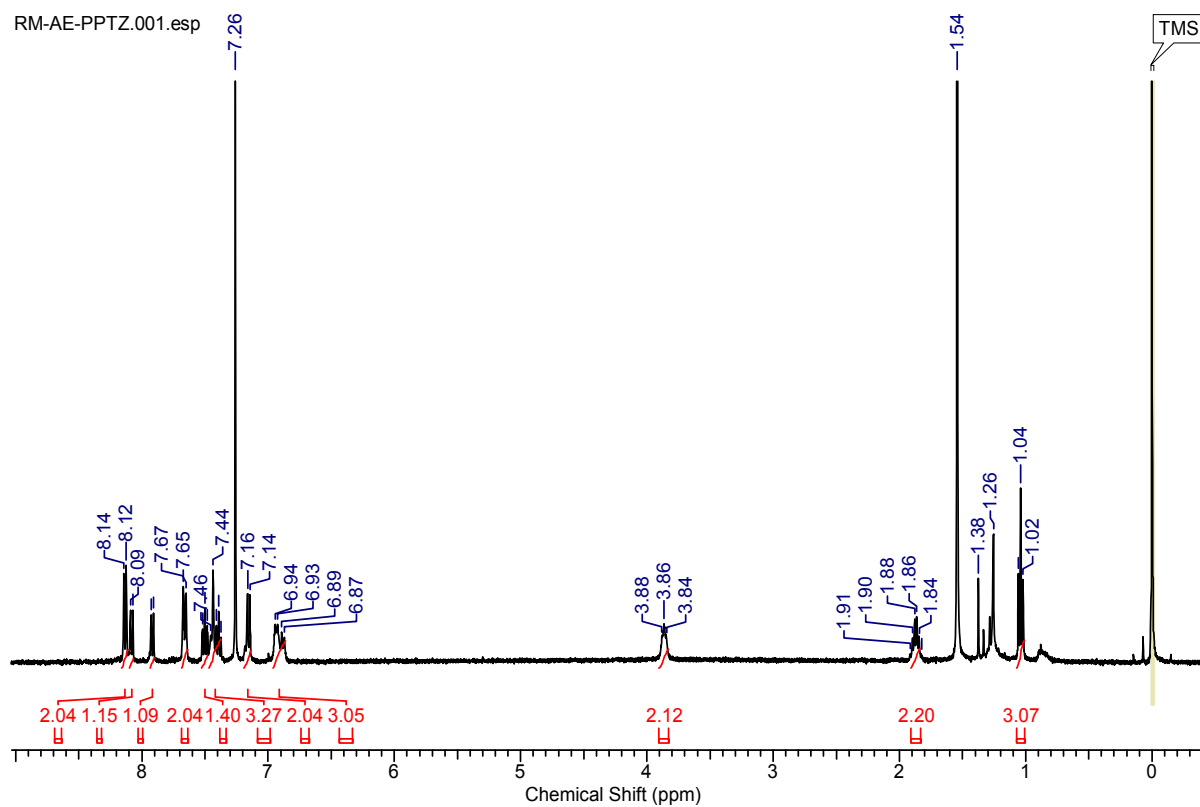

HRMS of *p*-PTZ:

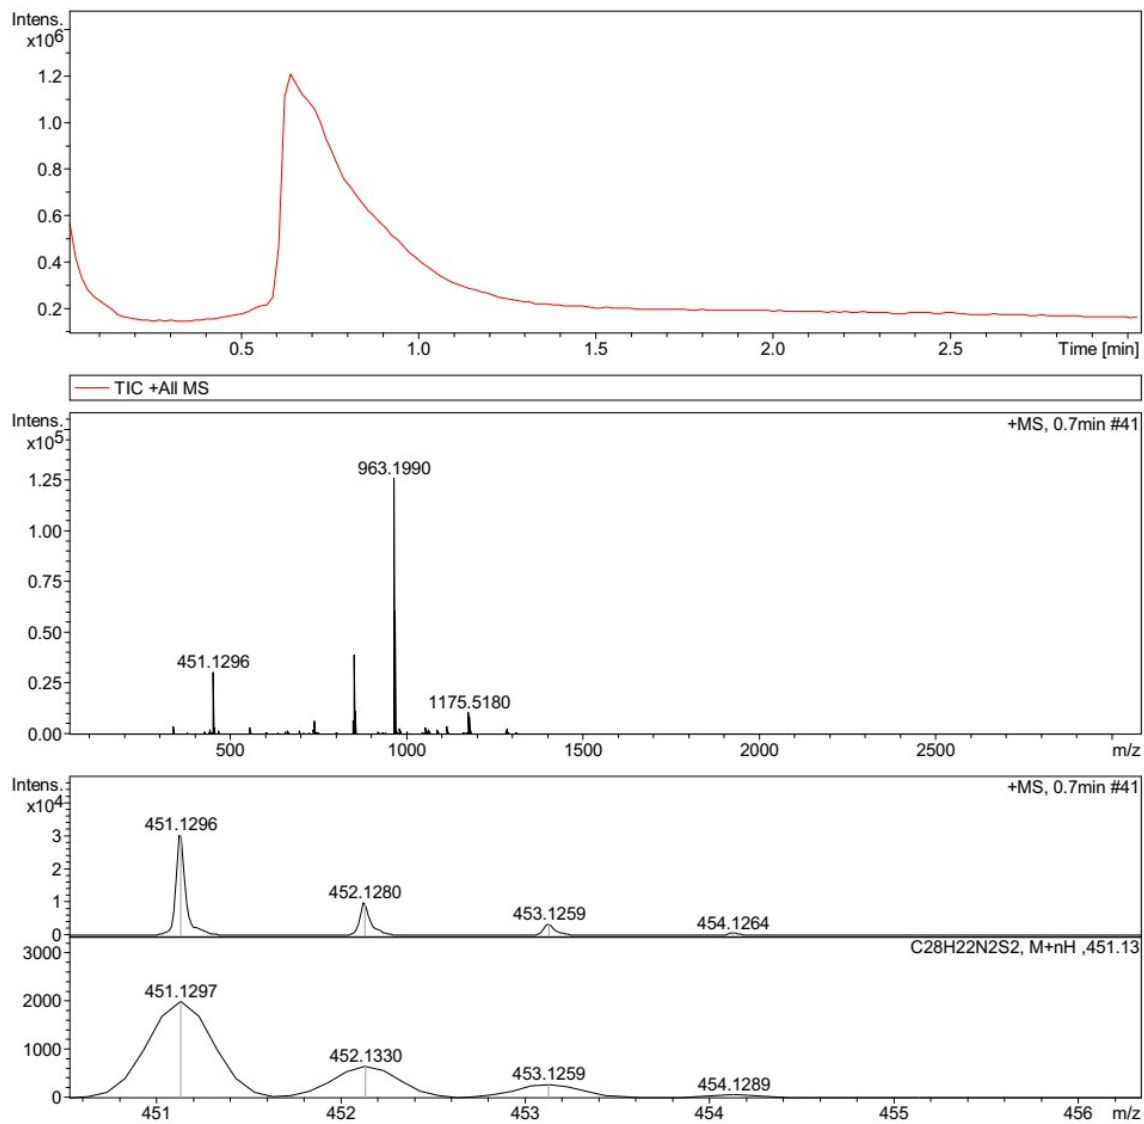

<sup>13</sup>C NMR of *p*-PTZ:

RM-AE-PP.001.esp

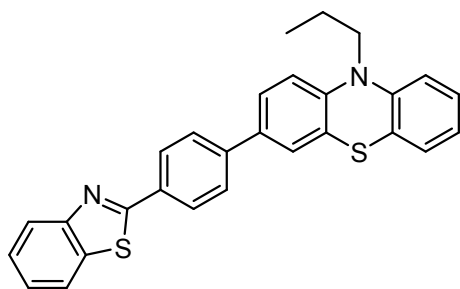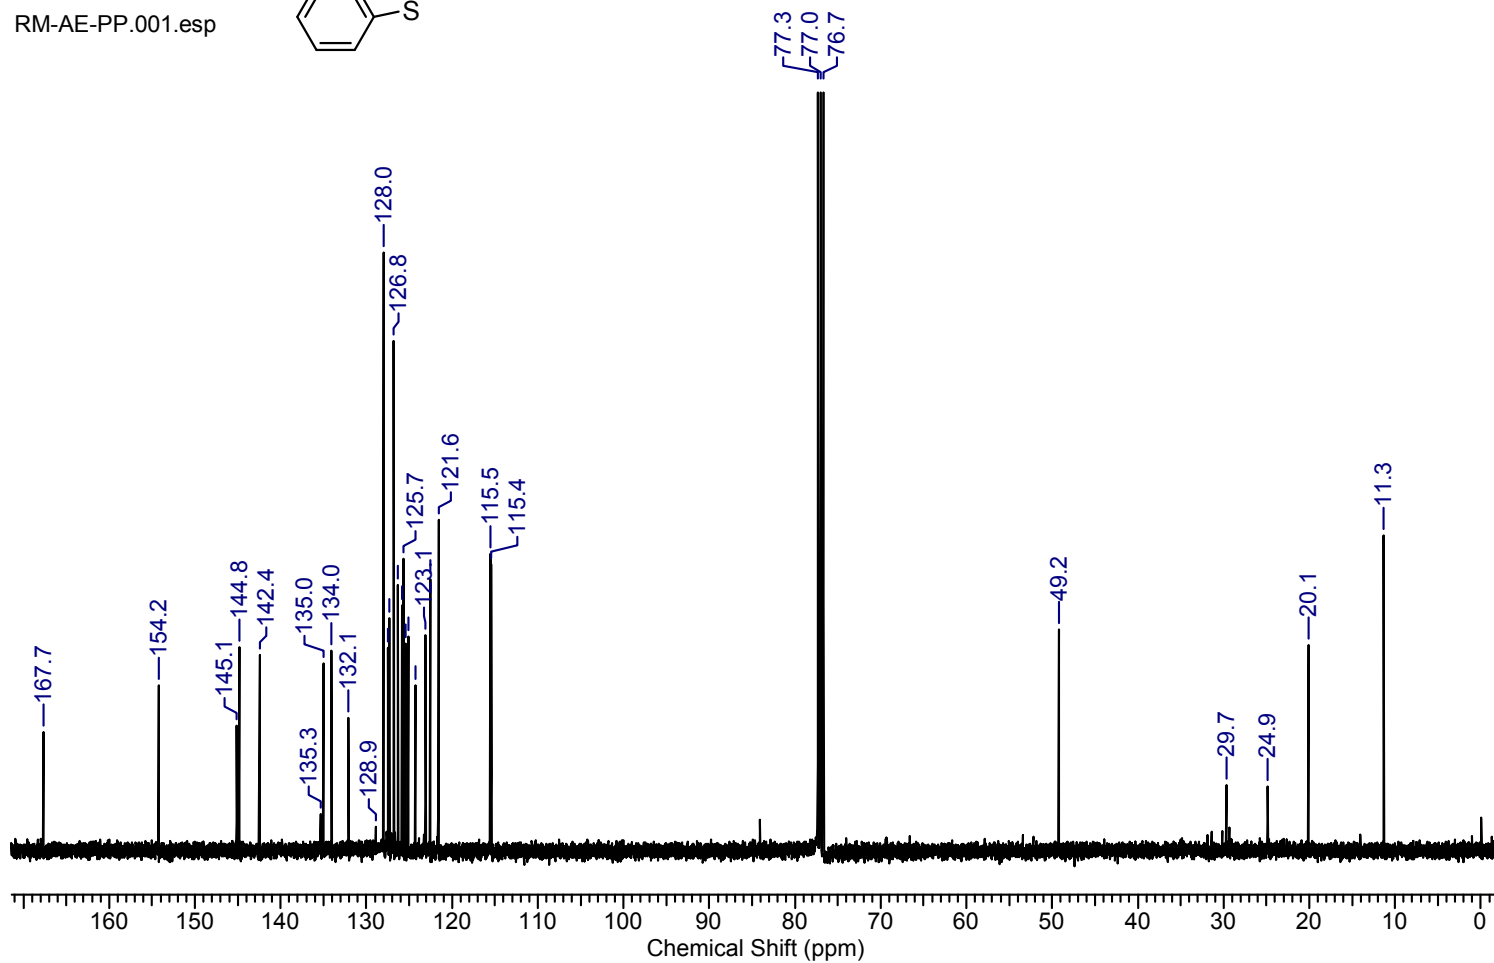

<sup>1</sup>H NMR of *m*-PTZ:

RM-AE-MP.001.esp

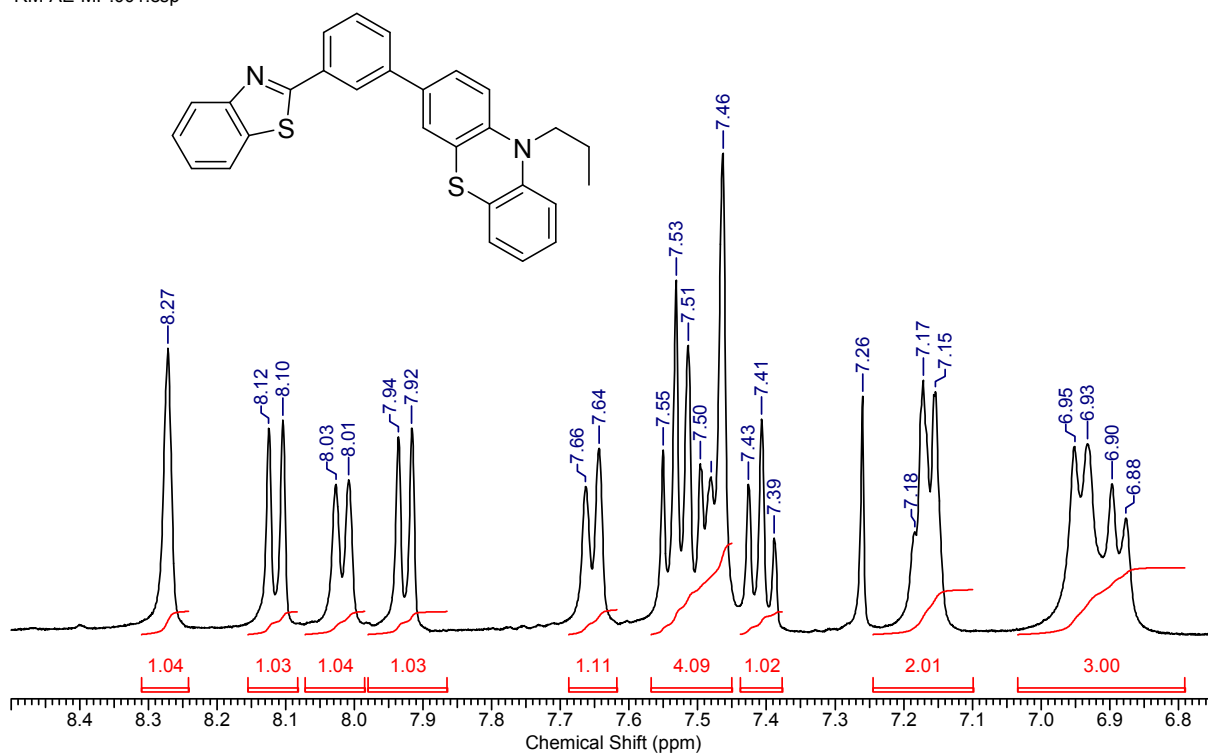

RM-AE-MP.001.esp

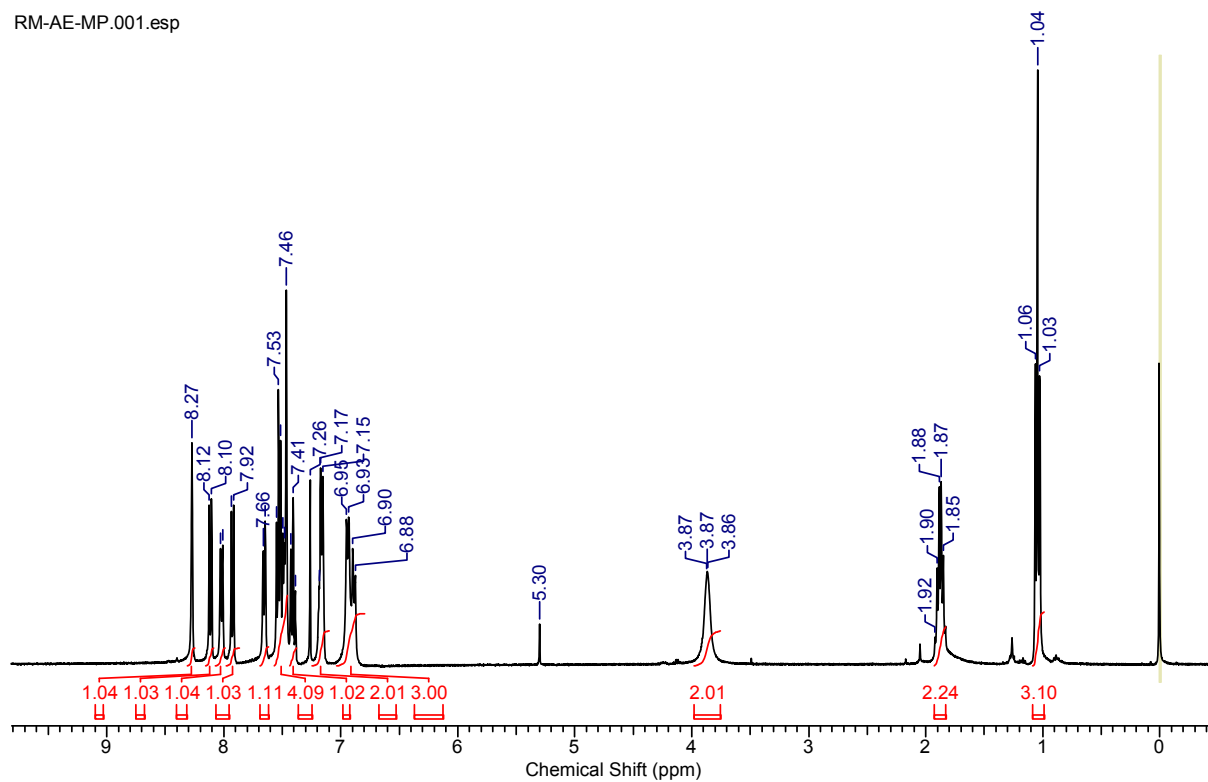

HRMS of *m*-PTZ:

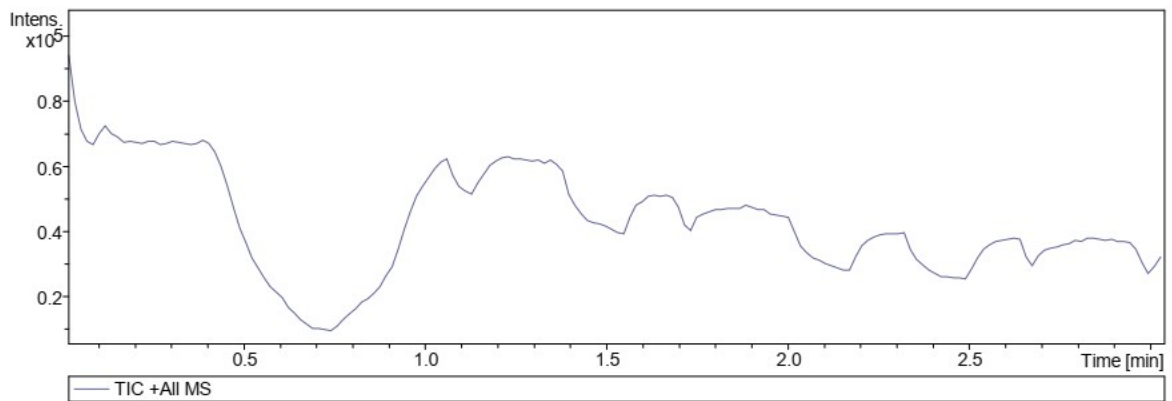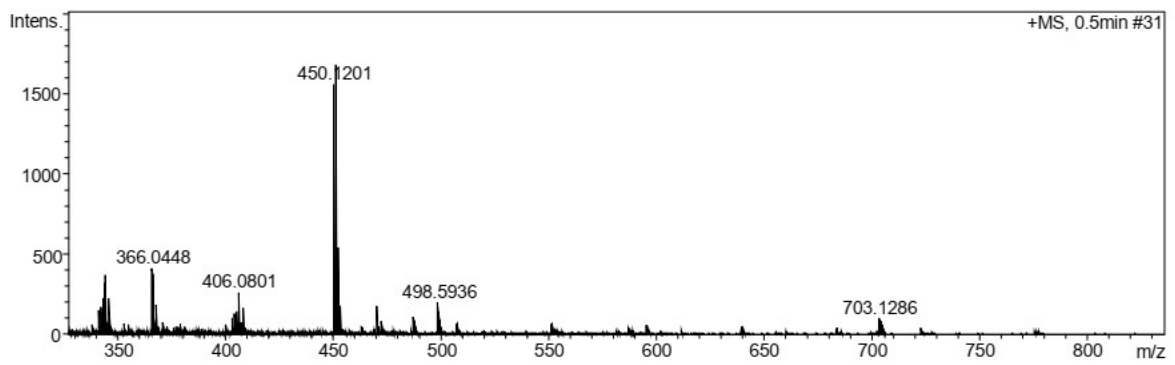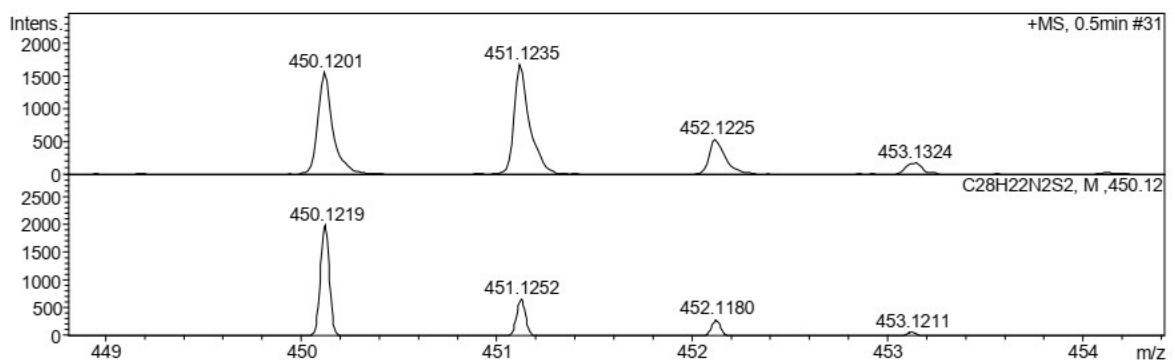

$^{13}\text{C}$  NMR of *m*-PTZ:

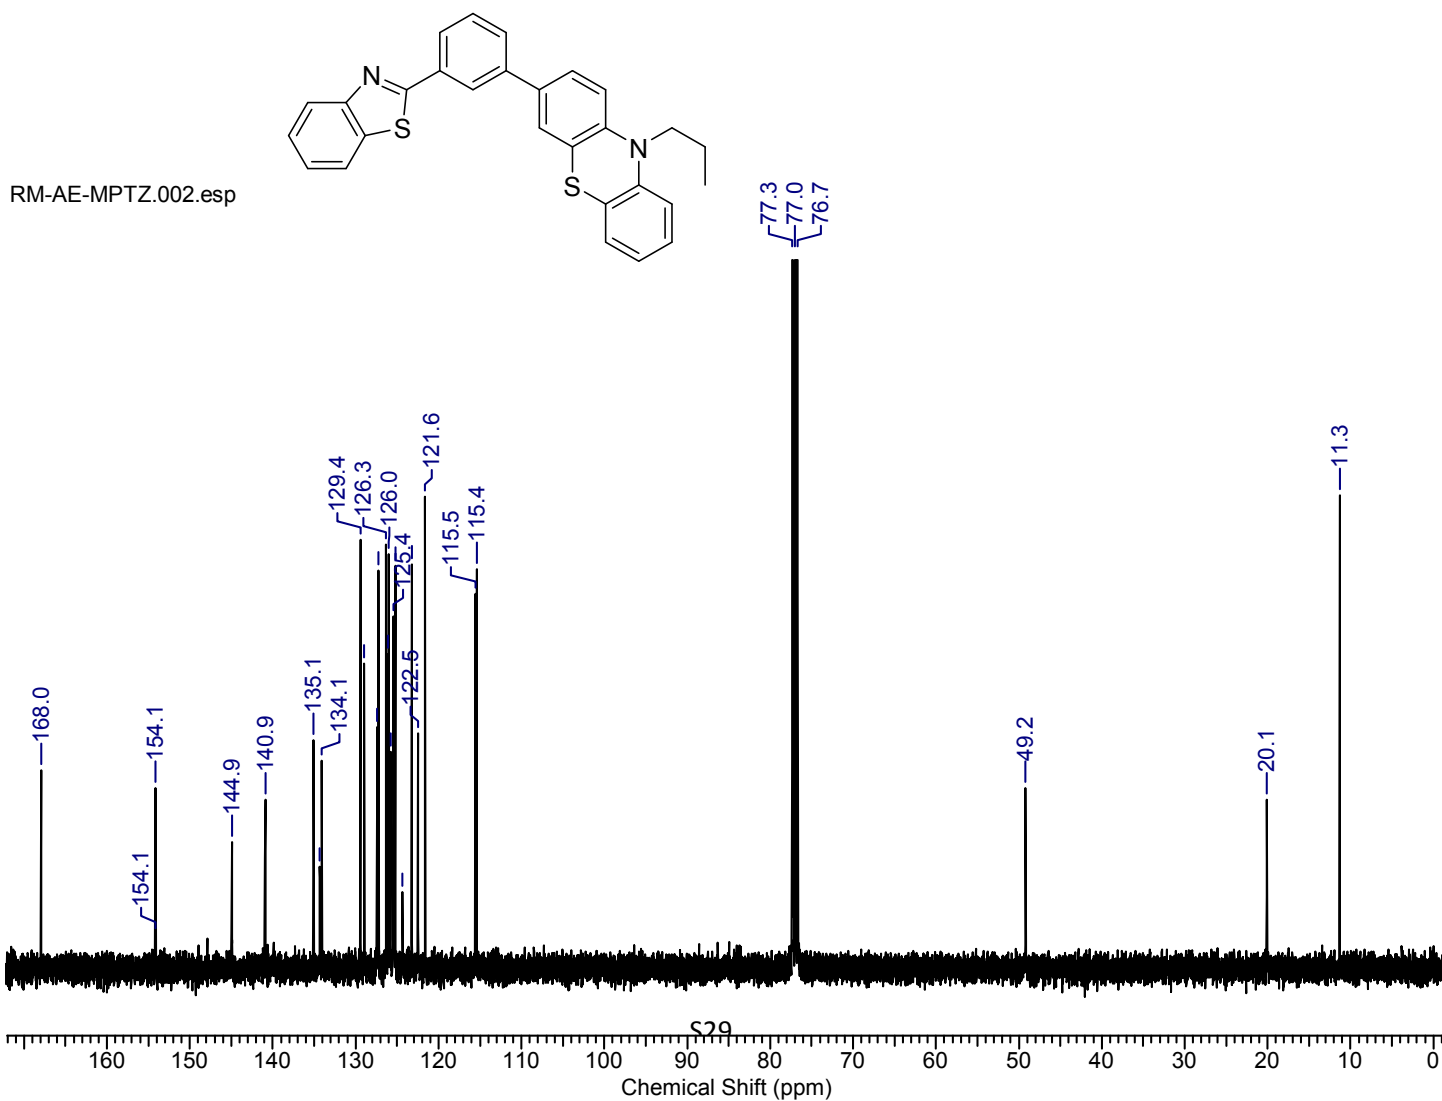



# <sup>1</sup>H NMR of *o*-PTZ:

RM-AE-OPTZ.001.esp

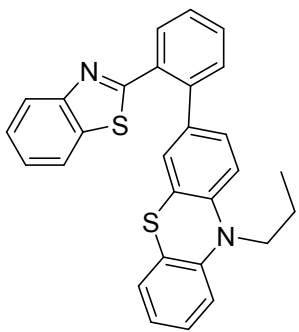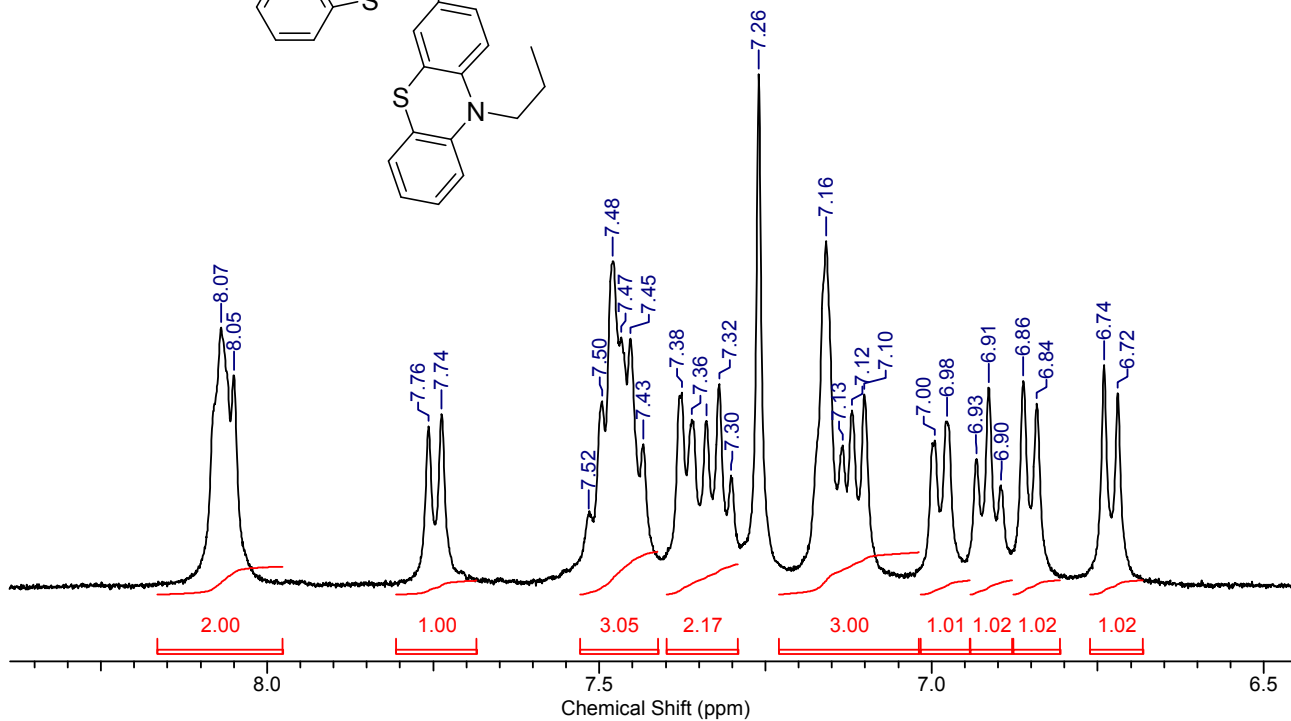

RM-AE-OPTZ.001.esp

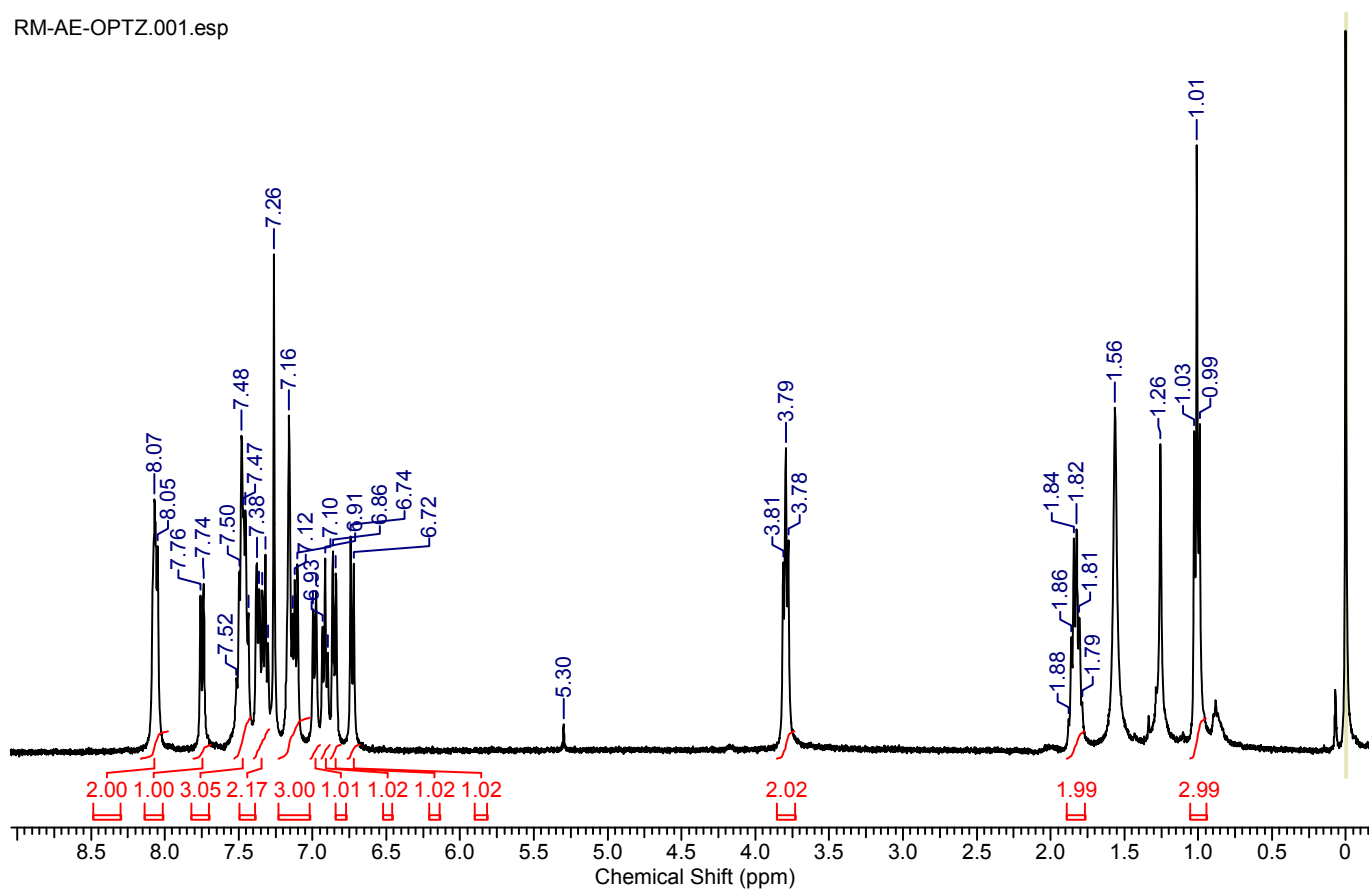



HRMS of *o*-PTZ:

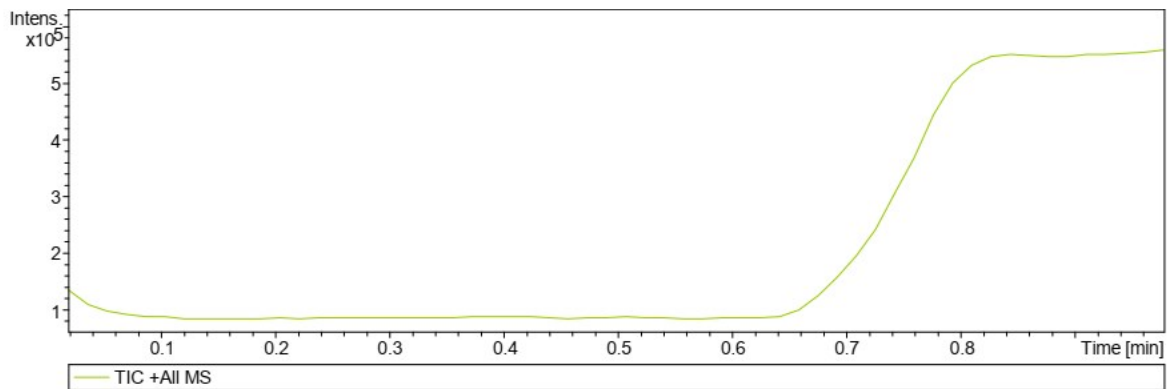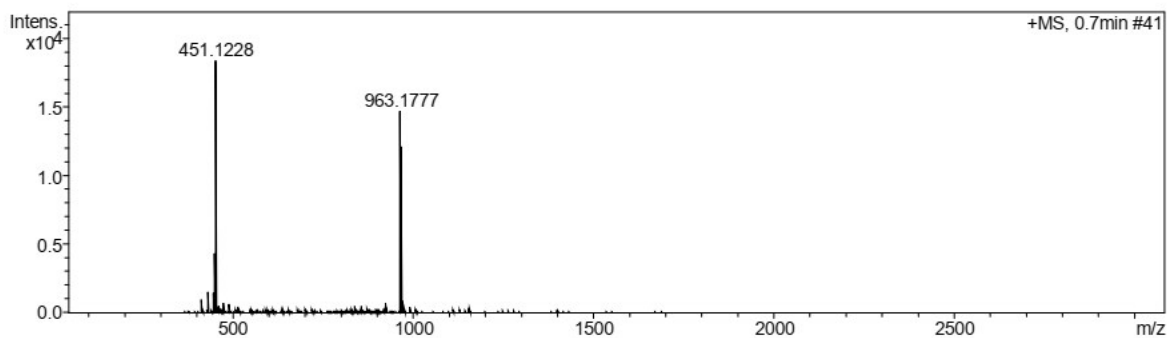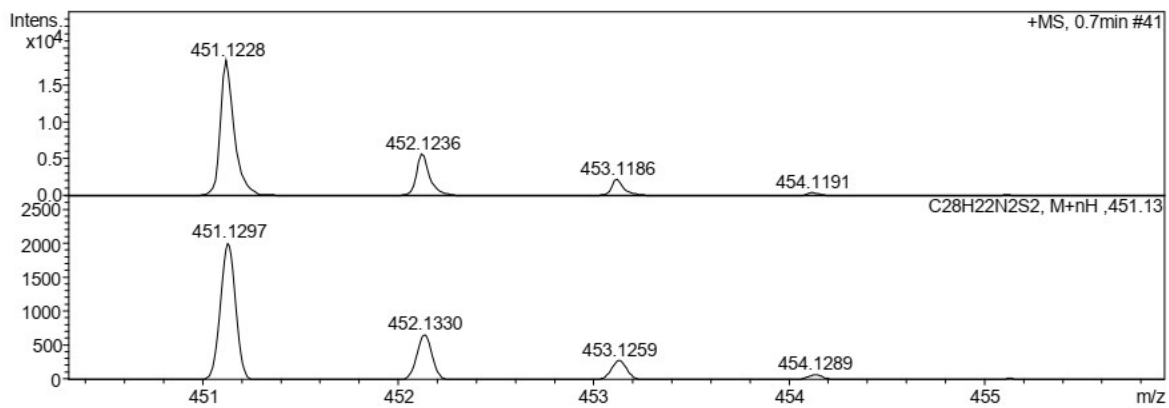

$^{13}\text{C}$  NMR of *o*-PTZ:

RM-AE-OP.001.esp

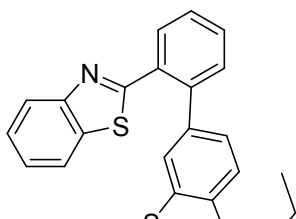

S38  
77.0  
76.7
